# Supplementary material for: Identification of Circulating Tumor DNA for the Early Detection of Small-cell Lung Cancer
Source: PubMed Central journal article supplement — eBioMedicine. 2016 Jun 25;10:117–23. doi: 10.1016/j.ebiom.2016.06.032 (PMC5036515; doi:10.1016/j.ebiom.2016.06.032), 2016-06-25
Supplement: mmc1.pdf [file mmc1.pdf]

## Supplementary Data

**Table S1.** ctDNA studies performed in early-stage tumors

| Reference                                                | Cancer type                                                                                                                 | Samples | Detection approach | Target         | Expected mutations in ctDNA | Detected mutations in ctDNA | Range of mutant allelic fraction detected | Clinical outcome                                                                                                                    |
|----------------------------------------------------------|-----------------------------------------------------------------------------------------------------------------------------|---------|--------------------|----------------|-----------------------------|-----------------------------|-------------------------------------------|-------------------------------------------------------------------------------------------------------------------------------------|
| Bettegowda <i>et al</i> , <i>Sci Trans Med</i> 2014      | bladder, breast, colorectal, endometrial, head and neck, gastroesophageal, melanoma, non-small cell lung, pancreatic ductal | 182     | dPCR               | panel of genes | variable**                  | 40%-60%                     | 1,1-22000 mutant fragments/5mL            | NE                                                                                                                                  |
| Sausen <i>et al</i> , <i>Nat Commun</i> 2015             | pancreatic ductal adenocarcinoma                                                                                            | 51      | dPCR               | <i>KRAS</i>    | 90%*                        | 43%                         | 0.01%-0.52%                               | higher risk of relapse in patients with detectable ctDNA at diagnosis                                                               |
| Beaver <i>et al</i> , <i>Clin Can Res</i> 2014           | breast cancer                                                                                                               | 29      | dPCR               | <i>PIK3CA</i>  | 52%**                       | 48%                         | 0.01%-2.99%                               | NE                                                                                                                                  |
| García-Mutillas <i>et al</i> , <i>Sci Trans Med</i> 2015 | breast cancer                                                                                                               | 55      | dPCR               | panel of genes | 76%**                       | 53%                         | 0.05%-0.8%                                | ctDNA detection at baseline, not predictive of disease-free survival. ctDNA abundance at baseline not associated with early relapse |
| Jamal-Hanjani <i>et al</i> , <i>Ann Oncol</i> 2016       | lung adenocarcinoma and squamous cell carcinoma                                                                             | 4       | multiplex PCR-NGS  | panel of SNVs  | 37 SNVs**                   | 16 SNVs(43%)                | 0.15-23.25%                               | NE                                                                                                                                  |

\* Based on previous studies

\*\* Based on tumor mutations

NE Not evaluated

§ According to concentration of mutations/ml



**Table S3.** Overview of the *TP53* mutations found in the plasma of 51 Russian SCLC patients with the mutations' allelic fractions (AF, %) detected in the two libraries, in both cfDNA and white-blood cells if applicable (NA, not done). *TP53* mutations are mapped to GenBank reference sequence NM\_000546.

| Sample  | Tumour stage | Detected in cfDNA    |             | Detected in white-blood cells |             |            |
|---------|--------------|----------------------|-------------|-------------------------------|-------------|------------|
|         |              | <i>TP53</i> mutation | Smallest AF | Highest AF                    | Smallest AF | Highest AF |
| SCLC-1  | IB           | p.E204*              | 1.95        | 4.22                          |             |            |
| SCLC-2  | IIB          | p.R156P              | 0.67        | 0.82                          |             |            |
| SCLC-3  | IIB          | P.G154V              | 0.61        | 1.13                          | NA          | NA         |
| SCLC-4  | IIIA         | P.K164E              | 5.86        | 7.33                          |             |            |
| SCLC-5  | IB           | p.V272M              | 0.40        | 0.54                          |             |            |
| SCLC-6  | IIB          | p.V216M              | 1.02        | 1.11                          |             |            |
|         |              | e7-2                 | 0.76        | 1.46                          |             |            |
| SCLC-7  | IIIA         | p.P177R              | 0.26        | 0.42                          |             |            |
|         |              | p.Q104*              | 6.88        | 11.49                         | NA          | NA         |
| SCLC-8  | IIIA         | p.G245fs             | 0.42        | 0.71                          |             |            |
|         |              | p.G245V              | 7.91        | 13.82                         |             |            |
| SCLC-9  | IIIA         | p.G244C              | 6.36        | 8.69                          |             |            |
| SCLC-10 | IIIA         | p.E286*              | 57.6        | 60.52                         | NA          | NA         |
| SCLC-11 | IIIA         | p.V157F              | 25.04       | 28.05                         |             |            |
|         |              | p.V153fs             | 57.31       | 84.08                         |             |            |
| SCLC-12 | IV           | p.L194R              | 0.12        | 0.19                          |             |            |
| SCLC-13 | IIIB         | p.H179R              | 23.89       | 24.25                         |             |            |
| SCLC-14 | IV           | p.S241fs             | 0.39        | 0.57                          |             |            |
|         |              | p.S241Y              | 77.47       | 84.81                         |             |            |
| SCLC-15 | IIIA         | p.G245V              | 2.38        | 2.96                          |             |            |
| SCLC-16 | IIIA         | p.R280*              | 34.72       | 37.23                         | NA          | NA         |
| SCLC-17 | IV           | p.C176Y              | 6.07        | 9.64                          |             |            |
| SCLC-18 | IIIA         | p.H179R              | 1.57        | 3.20                          | NA          | NA         |
| SCLC-19 | IV           | p.P72fs              | 23.94       | 24.27                         |             |            |
| SCLC-20 | IIIB         | p.P34fs              | 4.56        | 4.69                          |             |            |
| SCLC-21 | IIIB         | p.R280G              | 11.41       | 11.65                         |             |            |
|         |              | p.Y220C              | 0.90        | 1.27                          | 0.50        | 0.70       |
| SCLC-22 | IIIB         | p.E271V              | 0.71        | 0.88                          |             |            |
| SCLC-23 | IIIB         | p.Y163C              | 0.26        | 0.27                          |             |            |
| SCLC-24 | IIIA         | p.G244V              | 15.37       | 16.86                         |             |            |
| SCLC-25 | IV           | e7-1                 | 61.20       | 67.18                         | NA          | NA         |

**Table S4.** Overview of the *TP53* mutations found in the plasma of 123 non-cancer Russian controls with the mutations' allelic fractions (AF, %) detected in the two libraries, in both cfDNA and white-blood cells if applicable (NA, not done). TA refers to the mutations' functional classification based on the overall transcriptional activity from the IARC *TP53* database. *TP53* mutations are mapped to GenBank reference sequence NM\_000546.

| Sample        | Detected in cfDNA    |    |             |            | Detected in white-blood cells |            | Comments        |
|---------------|----------------------|----|-------------|------------|-------------------------------|------------|-----------------|
|               | <i>TP53</i> mutation | TA | Smallest AF | Highest AF | Smallest AF                   | Highest AF |                 |
| <b>MLT-1</b>  | p.K291E              | F  | 0.65        | 0.96       |                               |            |                 |
| <b>MLT-2</b>  | p.E258fs             |    | 0.23        | 0.38       |                               |            |                 |
| <b>MLT-3</b>  | p.H214Y              | PF | 0.27        | 4.04       | NA                            | NA         |                 |
| <b>MLT-4</b>  | p.C275W              | NF | 0.24        | 0.61       |                               |            |                 |
| <b>MLT-5</b>  | p.P34L               | NF | 1.14        | 1.19       |                               |            |                 |
|               | p.E346A              | F  | 0.26        | 0.85       |                               |            |                 |
|               | p.C238Y              | NF | 0.50        | 0.61       |                               |            |                 |
| <b>MLT-6</b>  | p.R175G              | NF | 4.09        | 4.41       | 4.40                          | 4.50       |                 |
|               | p.R175H              | NF | 1.31        | 2.05       |                               |            |                 |
|               | p.S261T              | ST | 1.01        | 1.50       |                               |            |                 |
| <b>MLT-7</b>  | p.D281E              | NF | 79.85       | 84.94      |                               |            |                 |
| <b>MLT-8</b>  | p.Y205*              |    | 0.19        | 0.49       | NA                            | NA         |                 |
| <b>MLT-9</b>  | p.R273H              | NF | 1.05        | 2.50       | NA                            | NA         |                 |
| <b>MLT-10</b> | p.K382fs             |    | 13.68       | 14.46      |                               |            |                 |
| <b>MLT-11</b> | p.R175H              | NF | 20.92       | 21.28      |                               |            |                 |
| <b>MLT-12</b> | p.G244C              | NF | 0.33        | 0.74       | NA                            | NA         |                 |
| <b>MLT-13</b> | p.144-145del         |    | 3.02        | 5.32       |                               |            |                 |
| <b>MLT-14</b> | p.G154S              | PF | 47.17       | 50.58      | 52.10                         | 54.90      | likely germline |

NF: non-functional

F: functional

PF: partially functional

ST: supertrans

**Table S5.** Overview of the *TP53* mutations found in the plasma of 9 Greece, 14 Czech Republic (CRE), 40 Italy (ITA), and 39 Argentina (ARG) non-cancer controls with the mutations' allelic fractions (AF, %) detected in the two libraries, in both cfDNA and white-blood cells if applicable (NA, not done). TA refers to the mutations' functional classification based on the overall transcriptional activity from the IARC *TP53* database. *TP53* mutations are mapped to GenBank reference sequence NM\_000546.

| Sample        | Detected in cfDNA    |    |             | Detected in white-blood cells |             |            | Comments        |
|---------------|----------------------|----|-------------|-------------------------------|-------------|------------|-----------------|
|               | <i>TP53</i> mutation | TA | Smallest AF | Highest AF                    | Smallest AF | Highest AF |                 |
| <b>ARG-1</b>  | p.R273C              | NF | 5.22        | 5.58                          | 7.30        | 10.40      |                 |
| <b>ARG-2</b>  | p.G105S              | NF | 0.78        | 1.99                          |             |            |                 |
| <b>ARG-3</b>  | p.K139R              | F  | 0.47        | 0.88                          |             |            |                 |
|               | p.E271V              | NF | 0.51        | 0.60                          |             |            |                 |
| <b>ARG-4</b>  | p.F341C              | NF | 0.33        | 0.47                          |             |            |                 |
| <b>CRE-5</b>  | p.F212fs             |    | 0.02        | 0.05                          |             |            |                 |
|               | p.S269N              | PF | 0.18        | 0.82                          |             |            |                 |
| <b>CRE-6</b>  | p.I254N              | NF | 0.07        | 0.09                          |             |            |                 |
| <b>ITA-7</b>  | p.S241C              | NF | 0.06        | 0.10                          |             |            |                 |
| <b>ITA-8</b>  | p.V272M              | NF | 0.78        | 0.80                          | 0.90        | 1.40       |                 |
| <b>ITA-9</b>  | p.G302W              | F  | 0.28        | 0.42                          |             |            |                 |
| <b>ITA-10</b> | p.R273L              | NF | 0.14        | 0.19                          |             |            |                 |
| <b>ITA-11</b> | p.T377I              | F  | 55.84       | 63.74                         | NA          | NA         | likely germline |

NF: non-functional

F: functional

PF: partially functional
